# Supplementary material for: Apatinib plus ifosfamide and etoposide for relapsed or refractory osteosarcoma: A retrospective study in two centres
Source: PubMed Central journal article supplement — Oncol Lett. 2021 May 24;22(1):552. doi: 10.3892/ol.2021.12813 (PMC8170178; doi:10.3892/ol.2021.12813), 2021-05-24

Figure S1. Kaplan-Meier plots for progression-free survival in 31 patients with advanced osteosarcoma receiving apatinib + ifosfamide and etoposide (IE) chemotherapy. Crosses indicate censored data.

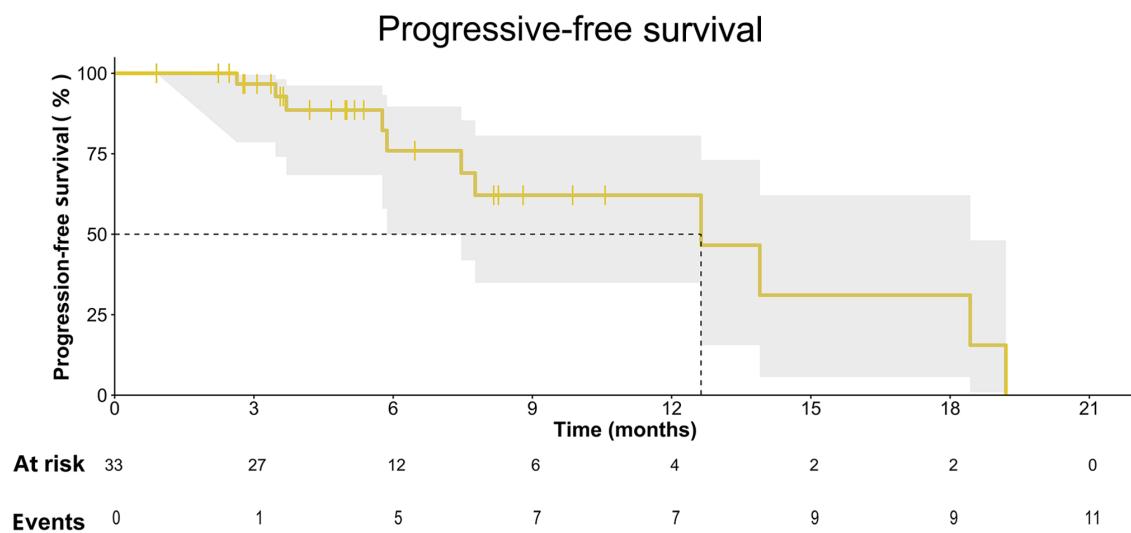

Supplement: Supplementary_Data.pdf [file Supplementary_Data.pdf]
